# Supplementary material
Source: PubMed Central journal article supplement (PMC9070655)

# Plastic Surgery Post-Operative Pain Questionnaire

- How satisfied were you with your postoperative pain control?  
(On a scale of 0 to 10, 0 being not controlled at all and 10 being completely controlled)

0-----1-----2-----3-----4-----5-----6-----7-----8-----9-----10

- What medications did you take at home after your surgery for pain?

- |                                                    |            |           |                                        |
|----------------------------------------------------|------------|-----------|----------------------------------------|
| 1. Ibuprofen/Aleve/Advil/Motrin                    | <b>Yes</b> | <b>No</b> | How many days did you take this? _____ |
| 2. Tylenol                                         | <b>Yes</b> | <b>No</b> | How many days did you take this? _____ |
| 3. Gabapentin/Neurontin                            | <b>Yes</b> | <b>No</b> | How many days did you take this? _____ |
| 4. Toradol (Ketorolac)                             | <b>Yes</b> | <b>No</b> | How many days did you take this? _____ |
| 5. Tramadol                                        | <b>Yes</b> | <b>No</b> | How many days did you take this? _____ |
| 6. Flexeril or Valium                              | <b>Yes</b> | <b>No</b> | How many days did you take this? _____ |
| 7. Oxycodone/Hydrocodone<br>Vicodin/Percocet/Norco | <b>Yes</b> | <b>No</b> | How many days did you take this? _____ |

- How satisfied were you with communication from your doctor's office about the purpose of each of these medications?  
(On a scale of 0 to 10, 0 being not satisfied at all and 10 being completely satisfied)

0-----1-----2-----3-----4-----5-----6-----7-----8-----9-----10

- How many opioid (Oxycodone/Hydrocodone/Vicodin/Percocet/Norco) pills did you take? \_\_\_\_\_
- How many do you have left over? \_\_\_\_\_
- Are you still taking opioid pain medication? **Yes** **No**
- Did you have to call the office or ask your doctor for a refill of opioid pain medication?  
**Yes** **No**
- Did you have to go to an ER, urgent care or other doctor for a refill of opioid pain medication?

**Continued on Page 2**

**Yes No**

- Where did you store your opioid pain medication?
  - a) Bedside table
  - b) Bathroom or kitchen cabinet
  - c) Other: \_\_\_\_\_
  
- Was the storage location locked?    **Yes**    **No**
  
- How did you dispose of your left over pain medication?
  - a) I haven't disposed of it yet
  - b) Trash can
  - c) Flushed it
  - d) Brought it back to a designated disposal or medication return site
  - e) I didn't have any left over
  - f) Other: \_\_\_\_\_
  
- Did you take opioid pain medication **before** your most recent surgery?    **Yes**    **No**

If yes: What medication did you take? \_\_\_\_\_

What dose? \_\_\_\_\_      How often? \_\_\_\_\_

## End of Survey

**Office Use:**

Surgery Date: \_\_\_\_\_

Today's Date: \_\_\_\_\_

Procedure(s): \_\_\_\_\_

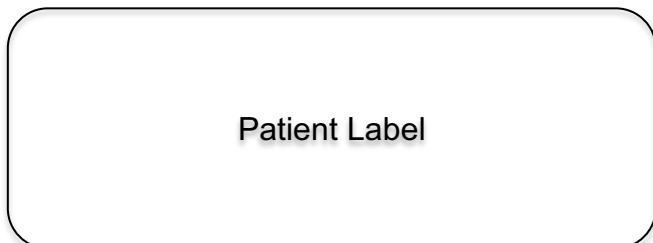

The James

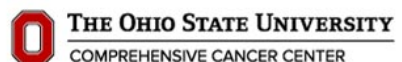

Supplement: NIHMS1790851-supplement-Supp1a.pdf [file NIHMS1790851-supplement-Supp1a.pdf]
