# Supplementary material
Source: PubMed Central journal article supplement (PMC9070655)
Supplement: NIHMS1790851-supplement-Supp1b.pdf [file NIHMS1790851-supplement-Supp1b.pdf]

# Plastic Surgery Post-Operative Pain Questionnaire

- Are you still taking any of these medications for pain BECAUSE OF YOUR SURGERY?

- |                                                    |            |           |
|----------------------------------------------------|------------|-----------|
| 1. Ibuprofen/Aleve/Advil/Motrin                    | <b>Yes</b> | <b>No</b> |
| 2. Tylenol                                         | <b>Yes</b> | <b>No</b> |
| 3. Gabapentin/Neurontin                            | <b>Yes</b> | <b>No</b> |
| 4. Toradol (Ketorolac)                             | <b>Yes</b> | <b>No</b> |
| 5. Tramadol                                        | <b>Yes</b> | <b>No</b> |
| 6. Flexeril or Valium                              | <b>Yes</b> | <b>No</b> |
| 7. Oxycodone/Hydrocodone<br>Vicodin/Percocet/Norco | <b>Yes</b> | <b>No</b> |

- Did you have to call the office or ask your doctor for a refill of opioid pain medication?

**Yes**    **No**

- Did you have to go to an ER, urgent care or other doctor for a refill of opioid pain medication?

**Yes**    **No**

- How did you dispose of your left over opioid pain medication?

- a) I haven't disposed of it yet
- b) Trash can
- c) Flushed it
- d) Brought it back to a designated disposal or medication return site
- e) I didn't have any left over
- f) Other: \_\_\_\_\_

---

**Office Use:**

Surgery Date: \_\_\_\_\_

Today's Date: \_\_\_\_\_

Patient Label

**The James**
