# Supplementary material
Source: PubMed Central journal article supplement (PMC9070655)

## Patient characteristics

|                                      | Responders | Non-responders | p-value |
|--------------------------------------|------------|----------------|---------|
| <i>Total</i>                         | 479        | 500            |         |
| <i>Age</i>                           |            |                |         |
| Mean (95% CI)                        | 53 (51-54) | 52 (51-54)     | p=0.71  |
| Median                               | 53         | 53             |         |
| Range                                | 18-91      | 19-90          |         |
| <i>Gender (%)</i>                    |            |                |         |
| Male                                 | 108 (23%)  | 98 (20%)       | p=0.26  |
| Female                               | 371 (77%)  | 402 (80%)      |         |
| <i>Disposition after surgery (%)</i> |            |                |         |
| Inpatient                            | 334 (70%)  | 316 (63%)      | p=0.031 |
| Outpatient                           | 145 (30%)  | 184 (37%)      |         |

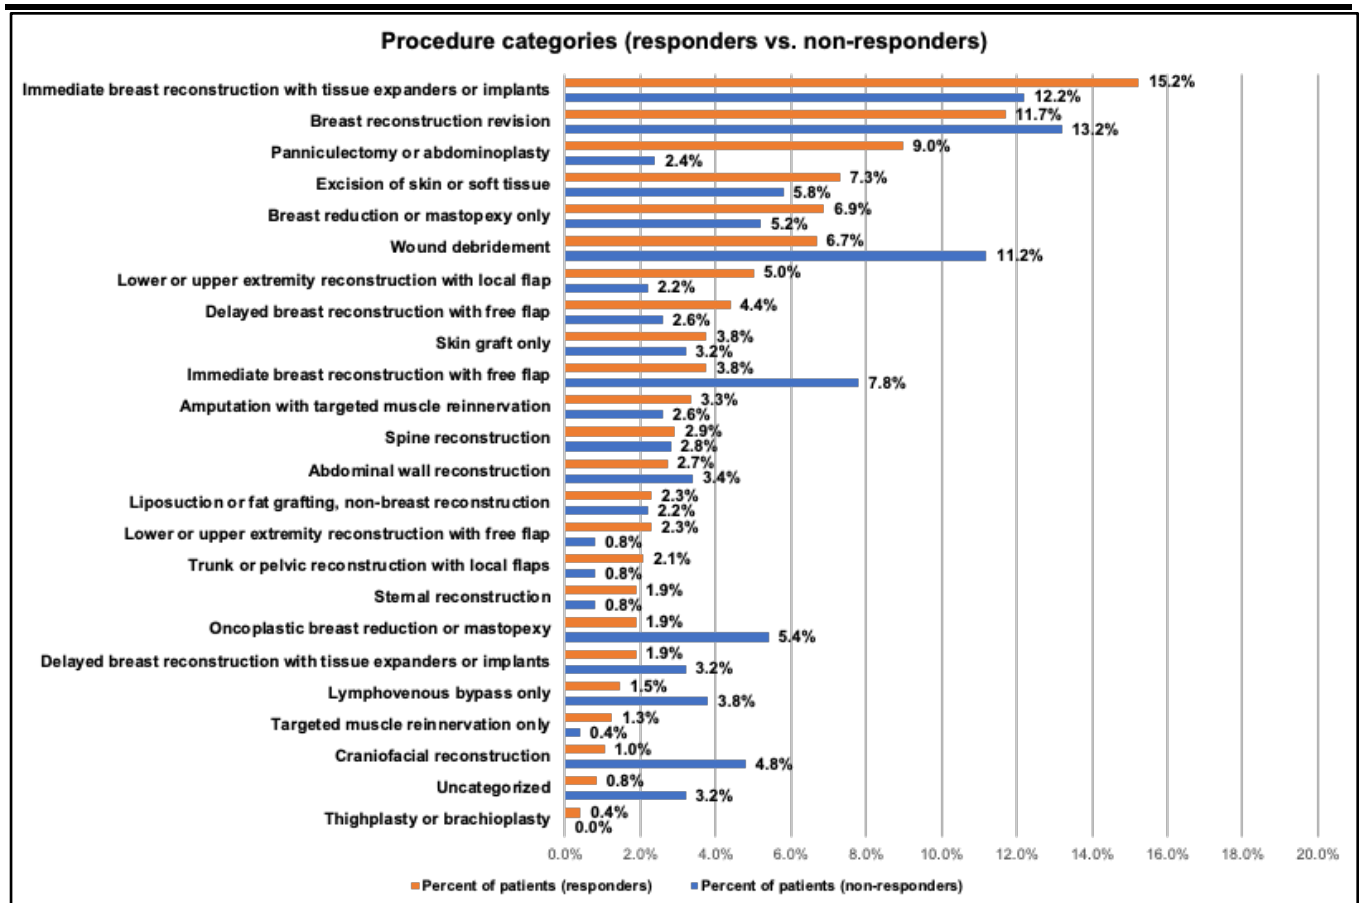

Supplement: NIHMS1790851-supplement-Supp2.pdf [file NIHMS1790851-supplement-Supp2.pdf]
