# Supplementary material
Source: PubMed Central journal article supplement (PMC9070655)
Supplement: NIHMS1790851-supplement-SuppTableI.pdf [file NIHMS1790851-supplement-SuppTableI.pdf]

| Procedure                                                                | Average OMEs prescribed/patient (SD) | Average OMEs over state-recommended dose | Number of patients prescribed more than state-recommended dose | Percent of patients prescribed more than state-recommended dose |
|--------------------------------------------------------------------------|--------------------------------------|------------------------------------------|----------------------------------------------------------------|-----------------------------------------------------------------|
| Immediate breast reconstruction with tissue expanders or implants (n=73) | 280.2 (153.6)                        | 70.2                                     | 34                                                             | 46.6%                                                           |
| Breast reconstruction revision (n=56)                                    | 125.6 (62.4)                         | -84.4                                    | 2                                                              | 3.6%                                                            |
| Panniculectomy or abdominoplasty (n=43)                                  | 193.1 (75.9)                         | -16.9                                    | 9                                                              | 20.9%                                                           |
| Excision of skin or soft tissue (n=35)                                   | 110.8 (98.5)                         | -99.2                                    | 2                                                              | 5.7%                                                            |
| Breast reduction or mastopexy only (n=33)                                | 142.7 (50.5)                         | -67.3                                    | 1                                                              | 3.0%                                                            |
| Wound debridement (n=32)                                                 | 201.3 (199.7)                        | -8.7                                     | 8                                                              | 25.0%                                                           |
| Lower extremity or upper extremity reconstruction with local flap (n=24) | 239.6 (205.5)                        | 29.6                                     | 8                                                              | 33.3%                                                           |
| Delayed breast reconstruction with free flap (n=21)                      | 140.2 (53.4)                         | -69.8                                    | 0                                                              | 0.0%                                                            |
| Immediate breast reconstruction with free flap (n=18)                    | 165.4 (82.7)                         | -44.6                                    | 2                                                              | 11.1%                                                           |
| Skin graft only (n=18)                                                   | 253.9 (302.9)                        | 43.9                                     | 4                                                              | 22.2%                                                           |
| Amputation w/targeted muscle reinnervation (n=16)                        | 595.0 (666.3)                        | 385.0                                    | 12                                                             | 75.0%                                                           |
| Spine reconstruction (n=14)                                              | 948.6 (2646.0)                       | 738.6                                    | 5                                                              | 35.7%                                                           |
| Abdominal wall reconstruction (n=13)                                     | 369.7 (534.4)                        | 159.7                                    | 4                                                              | 30.8%                                                           |
| Lower extremity or upper extremity reconstruction with free flap (n=11)  | 442.5 (520.2)                        | 232.5                                    | 4                                                              | 36.4%                                                           |
| Liposuction or fat grafting, non-breast reconstruction (n=11)            | 130.2 (52.6)                         | -79.8                                    | 0                                                              | 0.0%                                                            |
| Trunk or pelvic reconstruction with local flaps (n=10)                   | 531.9 (772.7)                        | 321.9                                    | 5                                                              | 50.0%                                                           |
| Delayed breast reconstruction with tissue expanders or implants (n=9)    | 161.4 (39.7)                         | -48.6                                    | 0                                                              | 0.0%                                                            |
| Oncoplastic breast reduction or mastopexy (n=9)                          | 168.9 (61.8)                         | -41.1                                    | 1                                                              | 11.1%                                                           |
| Sternal wound reconstruction (n=9)                                       | 123.3 (112.4)                        | -86.7                                    | 1                                                              | 11.1%                                                           |
| Lymphovenous bypass only (n=7)                                           | 87.1 (101.8)                         | -122.9                                   | 1                                                              | 14.3%                                                           |
| Targeted muscle reinnervation only (n=6)                                 | 209.2 (215.3)                        | -0.8                                     | 2                                                              | 33.3%                                                           |
| Craniofacial reconstruction (n=5)                                        | 102.0 (75.9)                         | -108.0                                   | 0                                                              | 0.0%                                                            |
| Thighplasty or Brachioplasty (n=2)                                       | 132.5                                | -77.5                                    | 0                                                              | 0.0%                                                            |
| <b>Total</b>                                                             | <b>236.9</b>                         | <b>26.9</b>                              | <b>105</b>                                                     | <b>22.1%</b>                                                    |
